# Supplementary material
Source: MDPI journal article supplement (https://www.mdpi.com/2673-6179/2/2/4)
Supplement: s1 [file s1]

Supplementary Figure S1: Histopathological diagnosis, EIS score, and sensitivity.

| EIS Score | Melanoma | Basal Cell Carcinoma (BCC) | Spino-cellular Carcinoma (SCC) | Actinic Keratosis | Morbus Bowen | Basos-squamous carcinoma | Dysplasia Severe | Dysplasia Mod | Dysplasia Mild | Dysplasia Unknown Severity | Benign | Not excised |
|-----------|----------|----------------------------|--------------------------------|-------------------|--------------|--------------------------|------------------|---------------|----------------|----------------------------|--------|-------------|
| 0         | 0        | 0                          | 0                              | 0                 | 0            | 0                        | 0                | 0             | 0              | 0                          | 0      | 20          |
| 1         | 0        | 0                          | 0                              | 0                 | 0            | 0                        | 0                | 0             | 0              | 0                          | 1      | 108         |
| 2         | 0        | 2                          | 0                              | 0                 | 0            | 0                        | 0                | 0             | 0              | 0                          | 2      | 153         |
| 3         | 0        | 3                          | 0                              | 1                 | 0            | 0                        | 0                | 6             | 0              | 0                          | 5      | 142         |
| 4         | 1        | 2                          | 0                              | 2                 | 0            | 0                        | 1                | 68            | 21             | 0                          | 25     | 38          |
| 5         | 0        | 5                          | 0                              | 4                 | 0            | 0                        | 0                | 44            | 18             | 3                          | 30     | 20          |
| 6         | 0        | 4                          | 0                              | 1                 | 4            | 0                        | 2                | 41            | 8              | 2                          | 9      | 13          |
| 7         | 1        | 10                         | 0                              | 3                 | 1            | 0                        | 0                | 9             | 6              | 1                          | 11     | 2           |
| 8         | 0        | 6                          | 1                              | 2                 | 0            | 0                        | 0                | 7             | 4              | 1                          | 6      | 2           |
| 9         | 1        | 5                          | 0                              | 0                 | 1            | 0                        | 0                | 3             | 1              | 0                          | 1      | 2           |
| 10        | 0        | 1                          | 2                              | 1                 | 1            | 1                        | 0                | 0             | 0              | 0                          | 6      | 1           |
|           | 3        | 38                         | 3                              | 14                | 7            | 1                        | 3                | 178           | 58             | 7                          | 96     | 501         |
| Total     |          |                            |                                |                   |              |                          |                  |               |                |                            | 408    | 909         |

|             |      |     |      |     |      |      |      |    |    |    |    |  |
|-------------|------|-----|------|-----|------|------|------|----|----|----|----|--|
| Sensitivity | 100% | 87% | 100% | 93% | 100% | 100% | 100% |    |    |    |    |  |
| Specificity |      |     |      | 7%  |      |      | 0%   | 3% | 0% | 0% | 8% |  |

|                                                            |        |
|------------------------------------------------------------|--------|
| NPV (All Malignancies & Not excised lesions)               | 98.9 % |
| PPV (All Malignancies & Not excised lesions)               | 10.1 % |
| PPV Score 4-6<br>(All Malignancies & Not excised lesions)  | 04.4 % |
| PPV Score 7-10<br>(All Malignancies & Not excised lesions) | 31.0 % |
